# Supplementary material for: A conservative pattern of water use, rather than deep or profuse rooting, is critical for the terminal drought tolerance of chickpea
Source: PubMed Central journal article supplement — J Exp Bot. 2011 May 24;62(12):4239–52. doi: 10.1093/jxb/err139 (PMC3153682; doi:10.1093/jxb/err139), 2011-05-24

## **A conservative pattern of water use, rather than deep or profuse rooting, is critical for the terminal drought tolerance of chickpea**

**Zaman-Allah Mainassara<sup>1</sup>, Jenkinson David M.<sup>2</sup>, Vadez Vincent<sup>1,\*</sup>**

### **Supplementary figures**

**Supplementary Fig. 1.** Variation of daily temperature (°C), relative humidity (%) and maximum VPD (kPa) during the experiment. Data were collected from a portable temperature and relative humidity recorder (Gemini Tinytag Ultra 2 TGU-4500 Datalogger), which was located in the crop canopy.

**Supplementary Fig. 2.** Relationship between the relative decrease in seed yield (ratio of seed yield WS / Seed yield WW) and the relative decrease in seed number (closed symbols) and the relative decrease in 100-seed weight (open symbols). Data are the means of 5 replicated plants per genotype and treatment.

**Supplementary Fig. 3.** Relationship (A) between seed yield under WS and under WW and (B) between the residual yield variations unexplained by yield potential (yield under WW conditions) and water uptake between 48-55 DAS (closed symbols) and between 48-61 DAS (open symbols) in chickpea genotypes grown in 1.2 m length PVC tubes. Yield and water uptake data are the means of five replicated plants for each genotype and treatment.

**Supplementary Fig. 1**

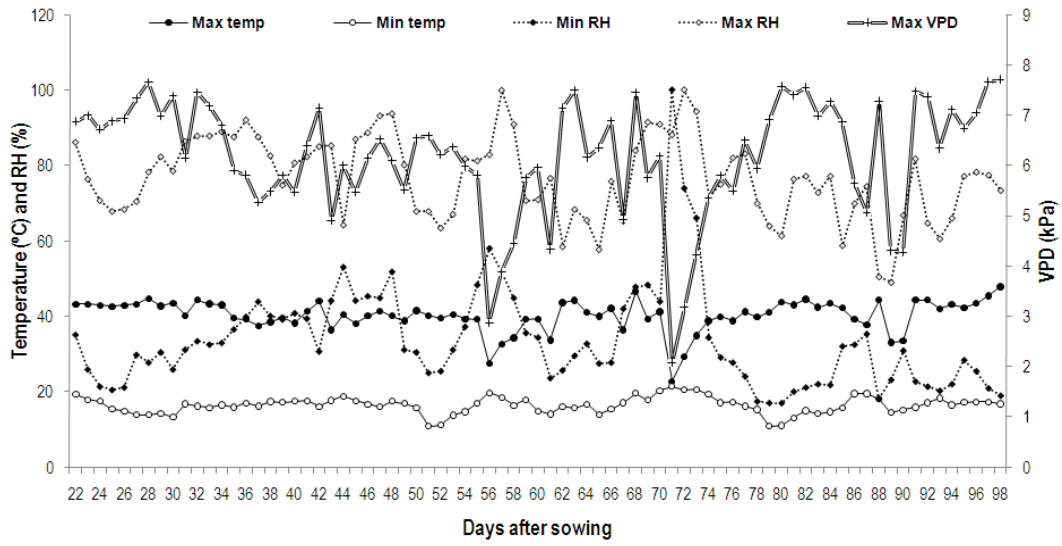

**Supplementary Fig. 2**

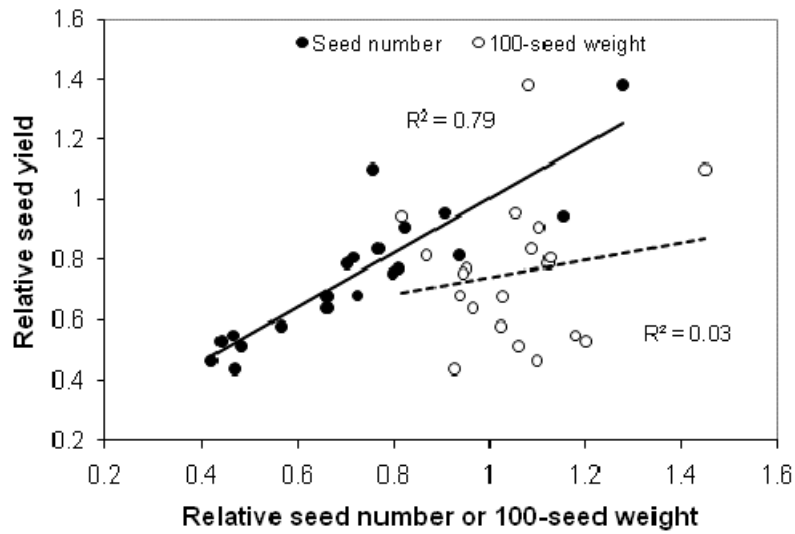

Supplement: supp_err139_00060418-file001.pdf [file supp_err139_00060418-file001.pdf]
